# Supplementary material
Source: PubMed Central journal article supplement (PMC4267693)
Supplement: NIHMS618252-supplement-Supplemental_Data.pdf [file NIHMS618252-supplement-Supplemental_Data.pdf]

INTERNET SEXUALITY QUESTIONNAIRE

[For best formatting use monospaced font and set margins at least 67 characters wide with 47 lines per page.]

Fritz Klein, M.D.  
0000 Park Boulevard #000  
San Diego CA 92116

James D. Weinrich, Ph.D.  
Univ. of California, San Diego  
0000 Fifth Avenue #000  
San Diego CA 92103

August 1994

Dear Female Volunteer:

Thank you for sending us your e-mail address and therefore volunteering for our study!

NOTE: If you are under 18 years of age, or if you did not in fact request a copy of our sexuality questionnaire, please accept our apologies. Stop reading here, close this document, and discard it.

The questionnaire contains 123 questions, broken down as follows:

- 9 questions about demographics (age, education, etc.)
- 11 questions about personality
- 21 questions about sexual orientation (the "Klein Grid")
- 58 questions about what excites you sexually
- 23 questions about your childhood non-sexual activities

You have three ways to return your answers to us: e-mail, US Mail, or fax.

(1) E-mail: To respond in this way, just open the questionnaire in your word processor and delete all the answers you don't wish to choose. So if the question was:

- 227 Are you...
  - A A Freemason
  - B An Elk
  - C A Rotarian
  - D None of the above

and the correct answer for you is C, then you should delete the lines beginning with A, B, and D, so the result would be:

- 227 Are you...
  - C A Rotarian

To answer a numerical question, just type in your response; e.g.:

My age: 33

You should simply ignore the answer sheets which constitute the last few pages of this transmission.

THIS NOTICE IS SO IMPORTANT THAT WE'RE PUTTING IT ALL IN CAPS!

IF YOU CHOOSE TO SEND IN YOUR ANSWERS BY E-MAIL THERE IS NO WAY THAT YOUR CONFIDENTIALITY CAN BE GUARANTEED, EVEN IF YOU RETURN IT USING YOUR HANDLE INSTEAD OF YOUR REAL NAME. IF YOU ARE CONCERNED THAT SOMEONE MIGHT CONNECT YOU WITH YOUR ANSWERS THEN DO NOT CHOOSE THIS METHOD!

(2) US Snail Mail: Print out the answer sheets on the last few pages of this questionnaire. Use a monospaced font (such as Courier) and set margins so that you have room for at least 67 characters on each line and at least 47 lines per page. Read each question and then, on the answer sheet, CROSS OUT or OBLITERATE each answer you choose. (Think back to when you took those standardized SAT tests in high school; it's the same principle.) Use an X or a solid blob to obliterate your choice. Do not circle your answers, and don't use a single slash. Fold the answer sheets neatly and mail them in a business-sized (or larger) envelope to:

Fritz Klein, M.D.  
0000 Park Boulevard #000  
San Diego CA 92116

This is the method which best protects your confidentiality.

(3) Fax: Print out the answer sheets on the last few pages of this questionnaire. Use a monospaced font (such as Courier) and set margins so that you have room for at least 67 characters on each line and at least 47 lines per page. Read each question and then, on the answer sheet, CROSS OUT or OBLITERATE each answer you choose. (Think back to when you took those standardized SAT tests in high school; it's the same principle.) Use an X or a solid blob to obliterate your choice. Do not circle your answers, and don't use a single slash.. Fax the completed answer sheets to Dr. Weinrich's fax number:

(619) 000-0000

Although there are occasional problems with our receiving fax modem, most succeed on the first try, and nearly everyone else on the second or third.

ANOTHER IMPORTANT NOTE ABOUT CONFIDENTIALITY: Although fax security is often better than e-mail security, this might not be the case for you. For example, if you use a network fax modem, if your phone line is tapped, if your fax machine automatically identifies itself with a phone number or a descriptive phrase, YOUR CONFIDENTIALITY CANNOT BE ASSURED! Please use snail mail if this is of concern to you.

#### ABOUT THE AUTHORS

This set of questionnaires is being circulated by two internationally known sex researchers who are interested in understanding why people prefer the sexual acts they prefer. Dr. Fritz Klein is the author of *The Bisexual Option* (Haworth Press, New York, 1993) and the inventor of the Klein Sexual Orientation Grid. He is a psychiatrist living in San Diego. Dr. Jim Weinrich wrote *Sexual Landscapes: Why We Are What We Are, Why We Love Whom We Love* (Scribners, New York, 1987), and is now an AIDS researcher at the University of California, San Diego. Both have appeared in numerous professional forums and on many popular talk shows.

=====  
=====PAGE BREAK=====

\*\*\*\*\*  
General Information  
\*\*\*\*\*

We need to know the following information about you in order to know how to compare the answers from Internet volunteers with other groups we will be working with. None of this information will be used to identify you personally.

01 Begin by telling us your age: 00

02 Next tell us your level of education:

SHS: Some high school  
HSG: High school grad  
SC: Some college  
CG: College grad  
HD: Higher degree

03 Tell us your employment status:

:F: Full time  
:P: Part time  
:U: Unemployed  
:R: Retired  
:S: Student

04 Gender: Choose "Female" if you are female.

:F: Female  
:M: Male

Note: THIS IS THE QUESTIONNAIRE FOR WOMEN! If you are a man, contact us and we will e-mail you the men's questionnaire.

05 Marital status (marriage to a member of the other sex):

:M: Currently married or in a similar committed relationship.  
:D: Currently divorced or separated.  
:S: Single, never married.

06 Homosexual relationship status (member of the same sex):

:C: Currently in a committed relationship with a female.  
:N: Currently not in a committed female-female relationship.

07 Frequency of masturbation: In the past month, how often have you masturbated to orgasm while alone?

# times per month

08 Frequency of sexual contact: In the past month, how many times have you had some form of sexual contact with another person?

# times past month

09 Number of partners: In the past month, with how many different people have you had sexual contact?

# times past month

\*\*\*\*\*  
Personality Questions  
\*\*\*\*\*

Please read each of the statements below and decide whether you would agree or disagree with the statement made. If you agree with the statement, or think that it is true about you, choose "T" (for true). If you disagree with the statement, or think that it is not true about you, choose "F" (for false). If you don't know or can't decide, choose "DK". Please respond to every item, even if you must guess on some.

10 I value respect for rules and good manners more than easy living.

- T True
- DK Don't know or can't decide
- F False

11 Teachers, ministers, and others spend too much time trying to stop us from doing what we want to do.

- T True
- DK Don't know or can't decide
- F False

12 People should insist more than they now do that moral standards be strictly followed.

- T True
- DK Don't know or can't decide
- F False

13 I think that being free to do what I want is more important than good manners and respect for rules.

- T True
- DK Don't know or can't decide
- F False

14 In making a decision, I always think carefully about what's right and proper.

- T True
- DK Don't know or can't decide
- F False

15 Most rules are made to be broken when there are good reasons for it.

- T True
- DK Don't know or can't decide
- F False

For the questions below, choose the one choice of the three with which you agree the most. The middle choice, "DK", means you can't decide whether you prefer the first or last choice.

16 I'd rather see a home that:

- A has strict standards of behavior;
- B DK
- C doesn't have too many rules.

17 I admire more:

- A a person who has average abilities, but strict morals.
- B DK

C a person who is very talented, but is sometimes not very responsible.

18 I get annoyed when people insist that I follow every single minor safety rule.

- A True, it's not always necessary.
- B DK
- C False, it's important to do things right.

19 If a bank were careless and didn't charge me for something, I'd feel:

- A I had to point it out and pay.
- B DK
- C it's not my business to tell them.

20 If a person is clever enough to get around the rules without seeming to break them, he or she should:

- A do it if there is a special reason.
- B DK
- C not do it.

\*\*\*\*\*  
Klein Sexual Orientation Grid  
\*\*\*\*\*

Use the following choices to answer the questions in this section.

- Choices: Choose 1 to indicate other sex only.  
Choose 2 to indicate other sex mostly.  
Choose 3 to indicate other sex somewhat more.  
Choose 4 to indicate both sexes equally.  
Choose 5 to indicate same sex somewhat more.  
Choose 6 to indicate same sex mostly.  
Choose 7 to indicate same sex only.

21 Select a number that best describes your sexual attraction PRESENTLY (within the past year): 1 2 3 4 5 6 7

22 Select a number that best describes your sexual attraction in the PAST: 1 2 3 4 5 6 7

23 Select a number that best describes your sexual attraction in the IDEAL: 1 2 3 4 5 6 7

24 Select a number that best describes your sexual behavior PRESENTLY (within the past year): 1 2 3 4 5 6 7

25 Select a number that best describes your sexual behavior in the PAST: 1 2 3 4 5 6 7

26 Select a number that best describes your sexual behavior in the IDEAL: 1 2 3 4 5 6 7

27 Select a number to describe your sexual fantasies PRESENTLY (for example, during masturbation, daydreaming, as part of real life, or in your imagination): 1 2 3 4 5 6 7

28 Select a number to describe your sexual \_fantasies\_ in the PAST: 1 2 3 4 5  
6 7

29 Select a number to describe your sexual \_fantasies\_ in the IDEAL: 1 2 3 4 5  
6 7

30 Select a number to describe your \_emotional preference\_ PRESENTLY (whom you  
love and like): 1 2 3 4 5 6 7

31 Select a number to describe your \_emotional preference\_ in the PAST: 1 2 3  
4 5 6 7

32 Select a number to describe your \_emotional preference\_ in the IDEAL: 1 2 3  
4 5 6 7

33 Select a number to describe the sex you \_socialize with\_ PRESENTLY (in the  
past year): 1 2 3 4 5 6 7

34 Select a number to describe the sex you have \_socialized with\_ in the PAST:  
1 2 3 4 5 6 7

35 Select a number to describe the sex you would prefer to \_socialize with\_ in  
the IDEAL: 1 2 3 4 5 6 7

Use the following choices to answer questions 36 to 41.

Choices Choose 1 to indicate heterosexual only.  
Choose 2 to indicate heterosexual mostly.  
Choose 3 to indicate heterosexual somewhat more.  
Choose 4 to indicate heterosexual/homosexual equally.  
Choose 5 to indicate homosexual somewhat more.  
Choose 6 to indicate homosexual mostly.  
Choose 7 to indicate homosexual only.

36 Select a number to describe your heterosexual, bisexual, or homosexual  
\_lifestyle\_ PRESENTLY (where and with whom you tend to spend the majority of  
your time): 1 2 3 4 5 6 7

37 Select a number to describe your heterosexual, bisexual, or homosexual  
\_lifestyle\_ in the PAST: 1 2 3 4 5 6 7

38 Select a number to describe your heterosexual, bisexual, or homosexual  
\_lifestyle\_ in the IDEAL: 1 2 3 4 5 6 7

39 Select a number to describe your \_sexual self-identification\_ (self-image)  
PRESENTLY (past year): 1 2 3 4 5 6 7

40 Select a number to describe your \_sexual self-identification\_ (self-image)  
in the PAST: 1 2 3 4 5 6 7

41 Select a number to describe your \_sexual self-identification\_ (self-image)  
in the IDEAL: 1 2 3 4 5 6 7

\*\*\*\*\*

Sex Acts (by women)

\*\*\*\*\*

Rate each sex act listed below from 1 to 5, with 1 being the least sexually exciting, and 5 being the most sexually exciting.

Sex acts with men

- 42 1 2 3 4 5 Kissing
- 43 1 2 3 4 5 Cuddling or holding
- 44 1 2 3 4 5 Cunnilingus (him going down on you)
- 45 1 2 3 4 5 Fellatio (you going down on his penis)
- 46 1 2 3 4 5 Receiving breast stimulation
- 47 1 2 3 4 5 Giving breast stimulation
- 48 1 2 3 4 5 Being masturbated by him
- 49 1 2 3 4 5 You masturbating him
- 50 1 2 3 4 5 Him fingering your anus
- 51 1 2 3 4 5 You fingering his anus
- 52 1 2 3 4 5 Receiving oral-anal (getting rimmed)
- 53 1 2 3 4 5 Giving oral-anal (rimming)
- 54 1 2 3 4 5 Penovaginal intercourse (ordinary fucking)
- 55 1 2 3 4 5 Receptive anal intercourse (getting ass-fucked)

Sex acts with women

- 56 1 2 3 4 5 Kissing
- 57 1 2 3 4 5 Cuddling or holding
- 58 1 2 3 4 5 Receiving cunnilingus (her going down on you)
- 59 1 2 3 4 5 Giving cunnilingus (you going down on her)
- 60 1 2 3 4 5 Receiving breast stimulation
- 61 1 2 3 4 5 Giving breast stimulation
- 62 1 2 3 4 5 Being masturbated by her
- 63 1 2 3 4 5 You masturbating her
- 64 1 2 3 4 5 Her fingering your anus
- 65 1 2 3 4 5 Fingering her anus
- 66 1 2 3 4 5 Receiving oral-anal (getting rimmed)
- 67 1 2 3 4 5 Giving oral-anal (rimming)
- 68 LEAVE THIS ANSWER BLANK
- 69 LEAVE THIS ANSWER BLANK

\*\*\*\*\*

Body Parts and Relationships

\*\*\*\*\*

Rate each body part and relationship listed below from 1 to 5, with 1 being the least sexually exciting, and 5 being the most sexually exciting.

Body parts of men

- 70 1 2 3 4 5 Face
- 71 1 2 3 4 5 Hair (head)
- 72 1 2 3 4 5 Breast/chest
- 73 1 2 3 4 5 Buttocks/buns/behind: large
- 74 1 2 3 4 5 Buttocks/buns/behind: small
- 75 1 2 3 4 5 Legs

- 76 1 2 3 4 5 Penis
- 77 1 2 3 4 5 Testicles/scrotum
- 78 1 2 3 4 5 Body hair: little or none
- 79 1 2 3 4 5 Body hair: a great deal
- 80 1 2 3 4 5 Torso: muscular
- 81 1 2 3 4 5 Torso: non-muscular

Body parts of women

- 82 1 2 3 4 5 Face
- 83 1 2 3 4 5 Hair (head)
- 84 1 2 3 4 5 Breasts: large
- 85 1 2 3 4 5 Breasts: small
- 86 1 2 3 4 5 Buttocks/buns/behind: large
- 87 1 2 3 4 5 Buttocks/buns/behind: small
- 88 1 2 3 4 5 Legs
- 89 1 2 3 4 5 Clitoris
- 90 1 2 3 4 5 Labia (the lips to the vagina)
- 91 1 2 3 4 5 Vagina

Relationships

- 92 1 2 3 4 5 One night stand with a man
- 93 1 2 3 4 5 One night stand with a woman
- 94 1 2 3 4 5 Long-term partnership with a man
- 95 1 2 3 4 5 Long-term partnership with a woman
- 96 1 2 3 4 5 Threesome: you and two men
- 97 1 2 3 4 5 Threesome: you, a man, and a woman
- 98 1 2 3 4 5 Threesome: you and two women
- 99 1 2 3 4 5 Orgy (more than two other people)

\*\*\*\*\*  
 Childhood Personality Scale (Women)  
 \*\*\*\*\*

Please answer the following questions about your childhood. For each question, choose the ONE answer that best describes you.

- 100 Between the ages of 6 and 12, did you prefer:
- A to play with boys
  - B to play with girls
  - C didn't make any difference
  - D not to play with other children
  - E don't remember

- 101 Between the ages of 6 and 12, did you:
- A prefer boys' games and toys (e.g. soldiers, football)
  - B prefer girls' games and toys (dolls, sewing, etc.)
  - C like or dislike both about equally
  - D had no opportunity to play games or with toys

- 102 In childhood, were you very interested in the work of a garage mechanic?  
 Was this:
- A prior to age 6
  - B between ages 6 and 12
  - C probably in both periods



D do not remember, or was not very interested in the work of a garage mechanic

103 Between ages 6 and 14, which did you like more: romantic stories or adventure stories?

- A I liked romantic stories more
- B I liked adventure stories more
- C It did not make any difference (or didn't like any stories)

104 Between the ages of 6 and 12, did you like to do jobs or chores which are usually done by men (handyman, etc.)?

- A yes
- B no
- C don't remember

105 Between the ages of 13 and 16, did you like to do jobs or chores which are usually done by men?

- A yes
- B no
- C don't remember

106 Between the ages of 6 and 12, when you read a story did you imagine that you were:

- A the male in the story/cowboy, detective, soldier, explorer, etc.
- B the female in the story (the girl being saved, etc.)
- C the male sometimes and the female other times
- D neither the male nor the female
- E did not read stories

107 In childhood or at puberty, did you like mechanics magazines? Was this:

- A between ages 6 and 12
- B between ages 12 and 14
- C probably in both periods
- D do not remember, or did not like mechanics magazines

108 Between the ages of 6 and 12, did you sometimes imagine yourself as being the courageous leader of others?

- A yes
- B no
- C unsure

109 Between the ages of 6 and 12, did you wish you had been born a boy instead of a girl?

- A often
- B occasionally
- C never

110 Between the ages of 13 and 16, did you wish you had been born a boy instead of a girl?

- A often
- B occasionally
- C never

111 Since the age of 17, have you wished you had been born a boy instead of a girl?

- A often
- B occasionally

C never

112 Do you think your appearance is:

- A very feminine
- B feminine
- C a little masculine
- D quite masculine

113 Between ages 6 and 12, did you sometimes imagine, in your fantasies, yourself physically defending someone against a monster, a dangerous animal, or "evil" people?

- A prior to age 6
- B between ages 6 and 12
- C probably in both periods
- D do not remember, or did not have such fantasies

114 In childhood fantasies, did you sometimes wish you could go hunting big game, or did you very much enjoy actually doing so? Was this:

- A prior to age 6
- B between ages 6 and 12
- C probably in both periods
- D do not remember, or did not have such fantasies

115 In childhood, did you wish you would become very strong physically? Was this:

- A prior to age 6
- B between ages 6 and 12
- C probably in both periods
- D do not remember, or did not have the desire to become very strong physically

116 In childhood, was there ever a period in which wished you would, when adult, become a dressmaker or dress designer? Was this:

- A prior to age 6
- B between ages 6 and 12
- C probably in both periods
- D do not remember, or did not have this desire

117 In childhood fantasies, did you sometimes imagine yourself driving a racing car? Was this:

- A prior to age 6
- B between ages 6 and 12
- C probably in both periods
- D do not remember, or did not have this fantasy

118 In childhood, did you ever wish to become a dancer? Was this:

- A prior to age 6
- B between ages 6 and 12
- C probably in both periods
- D do not remember, or did not have this desire

119 In childhood, did you ever wish to become a pilot, or did you fantasize yourself being a pilot? Was this:

- A prior to age 6
- B between ages 6 and 12
- C probably in both periods
- D do not remember, or did not have such a desire

- 120 Between the ages of 5 and 10, were you teased by other kids?  
A never  
B rarely (less than once a month)  
C sometimes  
D often (twice a week or more)
- 121 Which group of kids teased you in the most emotionally painful way?  
A smart kids  
B popular kids  
C athletic kids  
D misbehaving kids  
E rough-and-tumble, rough-housing kids  
F girls doing girl stuff  
G boys doing boy stuff  
H other kids never teased me
- 122 Were those teasing kids...  
A mostly boys  
B mostly girls  
C about half boys and half girls  
D other kids never teased me
- 123 Was the teasing you got from those kids...  
A the MOST emotionally painful experience of your childhood  
B SOME of your most emotionally upsetting experiences in childhood  
C only moderately upsetting  
D not upsetting at all

\*\*\*\*\*  
THANK YOU! THANK YOU! THANK YOU! THANK YOU! THANK YOU! THANK YOU!  
\*\*\*\*\*

If you wish to respond by e-mail, remember to DELETE all the answers which are INcorrect for you, leaving only the answers which are correct for you. You can also ignore the answer sheets which follow immediately after these notes.

\*\*\*\*\*

If you wish to respond by fax or by US Mail, you only need to print out the answer sheets which follow. As described in the instructions, use a pencil to CROSS OUT, BLOB OUT, or OBLITERATE each answer which is correct for you. Do not circle your answer and do not use a single slash. Then fax or mail these sheets of paper to us as described in the instructions.

=====PAGE BREAK=====

GENERAL INFORMATION ANSWER SHEET

- \* This answer sheet will be scanned by computer.
  - \* Use a pencil to mark your answers; completely erase a mistake.
  - \* Always cross out or obliterate the answer you choose.
  - \* Do not slop over onto neighboring answers or lines.
- [Questionnaire code: GI Internet]

|         |                        |                |            |
|---------|------------------------|----------------|------------|
| 01 AGE  | 02 EDUCATION           | 03 EMPLOYMENT  | 04 GENDER  |
| :0:     | :SHS: Some high school | :F: Full time  | :F: Female |
| :1: :1: | :HSG: High school grad | :P: Part time  | :M: Male   |
| :2: :2: | :SC: Some college      | :U: Unemployed |            |
| :3: :3: | :CG: College grad      | :R: Retired    |            |
| :4: :4: | :HD: Higher degree     | :S: Student    |            |
| :5: :5: |                        |                |            |
| :6: :6: | 05 MARITAL             | 06 HOMOSEXUAL  |            |
| :7: :7: | STATUS                 | RELATIONSHIP   |            |
| :8: :8: | :M: Married            | STATUS         |            |
| :9: :9: | :D: Divorced           | :C: Coupled    |            |
|         | :S: Single             | :N Not coupled |            |

|                 |              |             |
|-----------------|--------------|-------------|
| 07 MASTURBATION | 08 FREQUENCY | 09 PARTNERS |
| :0:             | :0:          | :0:         |
| :1: :1:         | :1: :1:      | :1: :1:     |
| :2: :2:         | :2: :2:      | :2: :2:     |
| :3: :3:         | :3: :3:      | :3: :3:     |
| :4: :4:         | :4: :4:      | :4: :4:     |
| :5: :5:         | :5: :5:      | :5: :5:     |
| :6: :6:         | :6: :6:      | :6: :6:     |
| :7: :7:         | :7: :7:      | :7: :7:     |
| :8: :8:         | :8: :8:      | :8: :8:     |
| :9: :9:         | :9: :9:      | :9: :9:     |

PERSONALITY

|    |     |      |     |
|----|-----|------|-----|
| 10 | :T: | :DK: | :F: |
| 11 | :T: | :DK: | :F: |
| 12 | :T: | :DK: | :F: |
| 13 | :T: | :DK: | :F: |
| 14 | :T: | :DK: | :F: |
| 15 | :T: | :DK: | :F: |
| 16 | :A: | :B:  | :C: |
| 17 | :A: | :B:  | :C: |
| 18 | :A: | :B:  | :C: |
| 19 | :A: | :B:  | :C: |
| 20 | :A: | :B:  | :C: |

KLEIN GRID ANSWER SHEET

[Questionnaire code: KSOG Internet]

21 :1: :2: :3: :4: :5: :6: :7:  
22 :1: :2: :3: :4: :5: :6: :7:  
23 :1: :2: :3: :4: :5: :6: :7:  
24 :1: :2: :3: :4: :5: :6: :7:  
25 :1: :2: :3: :4: :5: :6: :7:  
26 :1: :2: :3: :4: :5: :6: :7:  
27 :1: :2: :3: :4: :5: :6: :7:  
28 :1: :2: :3: :4: :5: :6: :7:  
29 :1: :2: :3: :4: :5: :6: :7:  
30 :1: :2: :3: :4: :5: :6: :7:  
31 :1: :2: :3: :4: :5: :6: :7:  
32 :1: :2: :3: :4: :5: :6: :7:  
33 :1: :2: :3: :4: :5: :6: :7:  
34 :1: :2: :3: :4: :5: :6: :7:  
35 :1: :2: :3: :4: :5: :6: :7:  
36 :1: :2: :3: :4: :5: :6: :7:  
37 :1: :2: :3: :4: :5: :6: :7:  
38 :1: :2: :3: :4: :5: :6: :7:  
39 :1: :2: :3: :4: :5: :6: :7:  
40 :1: :2: :3: :4: :5: :6: :7:  
41 :1: :2: :3: :4: :5: :6: :7:

| Least sexually exciting | Most sexually exciting | Least sexually exciting | Most sexually exciting |
|-------------------------|------------------------|-------------------------|------------------------|
| 42 :1: :2: :3: :4: :5:  |                        | 56 :1: :2: :3: :4: :5:  |                        |
| 43 :1: :2: :3: :4: :5:  |                        | 57 :1: :2: :3: :4: :5:  |                        |
| 44 :1: :2: :3: :4: :5:  |                        | 58 :1: :2: :3: :4: :5:  |                        |
| 45 :1: :2: :3: :4: :5:  |                        | 59 :1: :2: :3: :4: :5:  |                        |
| 46 :1: :2: :3: :4: :5:  |                        | 60 :1: :2: :3: :4: :5:  |                        |
| 47 :1: :2: :3: :4: :5:  |                        | 61 :1: :2: :3: :4: :5:  |                        |
| 48 :1: :2: :3: :4: :5:  |                        | 62 :1: :2: :3: :4: :5:  |                        |
| 49 :1: :2: :3: :4: :5:  |                        | 63 :1: :2: :3: :4: :5:  |                        |
| 50 :1: :2: :3: :4: :5:  |                        | 64 :1: :2: :3: :4: :5:  |                        |
| 51 :1: :2: :3: :4: :5:  |                        | 65 :1: :2: :3: :4: :5:  |                        |
| 52 :1: :2: :3: :4: :5:  |                        | 66 :1: :2: :3: :4: :5:  |                        |
| 53 :1: :2: :3: :4: :5:  |                        | 67 :1: :2: :3: :4: :5:  |                        |
| 54 :1: :2: :3: :4: :5:  |                        | 68 :1: :2: :3: :4: :5:  |                        |
| 55 :1: :2: :3: :4: :5:  |                        | 69 :1: :2: :3: :4: :5:  |                        |

BODY PARTS/RELATIONSHIPS ANSWER SHEET

[Questionnaire code: BPR Internet]

| Least sexually exciting |     |     |     | Most sexually exciting |     | Least sexually exciting |     |     |     | Most sexually exciting |     |
|-------------------------|-----|-----|-----|------------------------|-----|-------------------------|-----|-----|-----|------------------------|-----|
| 70                      | :1: | :2: | :3: | :4:                    | :5: | 82                      | :1: | :2: | :3: | :4:                    | :5: |
| 71                      | :1: | :2: | :3: | :4:                    | :5: | 83                      | :1: | :2: | :3: | :4:                    | :5: |
| 72                      | :1: | :2: | :3: | :4:                    | :5: | 84                      | :1: | :2: | :3: | :4:                    | :5: |
| 73                      | :1: | :2: | :3: | :4:                    | :5: | 85                      | :1: | :2: | :3: | :4:                    | :5: |
| 74                      | :1: | :2: | :3: | :4:                    | :5: | 87                      | :1: | :2: | :3: | :4:                    | :5: |
| 75                      | :1: | :2: | :3: | :4:                    | :5: | 88                      | :1: | :2: | :3: | :4:                    | :5: |
| 76                      | :1: | :2: | :3: | :4:                    | :5: | 89                      | :1: | :2: | :3: | :4:                    | :5: |
| 77                      | :1: | :2: | :3: | :4:                    | :5: | 90                      | :1: | :2: | :3: | :4:                    | :5: |
| 78                      | :1: | :2: | :3: | :4:                    | :5: | 91                      | :1: | :2: | :3: | :4:                    | :5: |
| 79                      | :1: | :2: | :3: | :4:                    | :5: |                         |     |     |     |                        |     |
| 80                      | :1: | :2: | :3: | :4:                    | :5: |                         |     |     |     |                        |     |
| 81                      | :1: | :2: | :3: | :4:                    | :5: |                         |     |     |     |                        |     |

|    |     |     |     | Least sexually exciting |     |  |  |  |  | Most sexually exciting |
|----|-----|-----|-----|-------------------------|-----|--|--|--|--|------------------------|
| 92 | :1: | :2: | :3: | :4:                     | :5: |  |  |  |  |                        |
| 93 | :1: | :2: | :3: | :4:                     | :5: |  |  |  |  |                        |
| 94 | :1: | :2: | :3: | :4:                     | :5: |  |  |  |  |                        |
| 95 | :1: | :2: | :3: | :4:                     | :5: |  |  |  |  |                        |
| 96 | :1: | :2: | :3: | :4:                     | :5: |  |  |  |  |                        |
| 97 | :1: | :2: | :3: | :4:                     | :5: |  |  |  |  |                        |
| 98 | :1: | :2: | :3: | :4:                     | :5: |  |  |  |  |                        |
| 99 | :1: | :2: | :3: | :4:                     | :5: |  |  |  |  |                        |

=====PAGE BREAK=====

CHILDHOOD PERSONALITY ANSWER SHEET

[Questionnaire code: CPA Internet]

100 :A: :B: :C: :D: :E:  
101 :A: :B: :C: :D:  
102 :A: :B: :C: :D:  
103 :A: :B: :C:  
104 :A: :B: :C:  
105 :A: :B: :C:

106 :A: :B: :C: :D: :E:  
107 :A: :B: :C: :D:  
108 :A: :B: :C: :D:  
109 :A: :B: :C:  
110 :A: :B: :C:  
111 :A: :B: :C:

112 :A: :B: :C: :D:  
113 :A: :B: :C: :D:  
114 :A: :B: :C: :D:  
115 :A: :B: :C: :D:  
116 :A: :B: :C: :D:  
117 :A: :B: :C: :D:

118 :A: :B: :C: :D:  
119 :A: :B: :C: :D:  
120 :A: :B: :C: :D:  
121 :A: :B: :C: :D: :E: :F: :G: :H:  
122 :A: :B: :C: :D:  
123 :A: :B: :C: :D:

=====  
=====END OF QUESTIONNAIRE=====

\*\*\*\*\*

INTERNET SEXUALITY QUESTIONNAIRE

[For best formatting use monospaced font and set margins at least 67 characters wide with 47 lines per page.]

Fritz Klein, M.D.  
0000 Park Boulevard #000  
San Diego CA 92116

James D. Weinrich, Ph.D.  
Univ. of California, San Diego  
0000 Fifth Avenue #000  
San Diego CA 92103

August 1994

Dear Male Volunteer:

Thank you for sending us your e-mail address and therefore volunteering for our study!

NOTE: If you are under 18 years of age, or if you did not in fact request a copy of our sexuality questionnaire, please accept our apologies. Stop reading here, close this document, and discard it.

The questionnaire contains 123 questions, broken down as follows:

- 9 questions about demographics (age, education, etc.)
- 11 questions about personality
- 21 questions about sexual orientation (the "Klein Grid")
- 58 questions about what excites you sexually
- 23 questions about your childhood non-sexual activities

You have three ways to return your answers to us: e-mail, US Mail, or fax.

(1) E-mail: To respond in this way, just open the questionnaire in your word processor and delete all the answers you don't wish to choose. So if the question was:

- 227 Are you...
  - A A Freemason
  - B An Elk
  - C A Rotarian
  - D None of the above

and the correct answer for you is C, then you should delete the lines beginning with A, B, and D, so the result would be:

- 227 Are you...
  - C A Rotarian

To answer a numerical question, just type in your response; e.g.:

My age: 33

You should simply ignore the answer sheets which constitute the last few pages of this transmission.

THIS NOTICE IS SO IMPORTANT THAT WE'RE PUTTING IT ALL IN CAPS!



IF YOU CHOOSE TO SEND IN YOUR ANSWERS BY E-MAIL THERE IS NO WAY THAT YOUR CONFIDENTIALITY CAN BE GUARANTEED, EVEN IF YOU RETURN IT USING YOUR HANDLE INSTEAD OF YOUR REAL NAME. IF YOU ARE CONCERNED THAT SOMEONE MIGHT CONNECT YOU WITH YOUR ANSWERS THEN DO NOT CHOOSE THIS METHOD!

(2) US Snail Mail: Print out the answer sheets on the last few pages of this questionnaire. Use a monospaced font (such as Courier) and set margins so that you have room for at least 67 characters on each line and at least 47 lines per page. Read each question and then, on the answer sheet, CROSS OUT or OBLITERATE each answer you choose. (Think back to when you took those standardized SAT tests in high school; it's the same principle.) Use an X or a solid blob to obliterate your choice. Do not circle your answers, and don't use a single slash. Fold the answer sheets neatly and mail them in a business-sized (or larger) envelope to:

Fritz Klein, M.D.  
0000 Park Boulevard #000  
San Diego CA 92116

This is the method which best protects your confidentiality.

(3) Fax: Print out the answer sheets on the last few pages of this questionnaire. Use a monospaced font (such as Courier) and set margins so that you have room for at least 67 characters on each line and at least 47 lines per page. Read each question and then, on the answer sheet, CROSS OUT or OBLITERATE each answer you choose. (Think back to when you took those standardized SAT tests in high school; it's the same principle.) Use an X or a solid blob to obliterate your choice. Do not circle your answers, and don't use a single slash. Fax the completed answer sheets to Dr. Weinrich's fax number:

(619) 000-0000

Although there are occasional problems with our receiving fax modem, most succeed on the first try, and nearly everyone else on the second or third.

ANOTHER IMPORTANT NOTE ABOUT CONFIDENTIALITY: Although fax security is often better than e-mail security, this might not be the case for you. For example, if you use a network fax modem, if your phone line is tapped, if your fax machine automatically identifies itself with a phone number or a descriptive phrase, YOUR CONFIDENTIALITY CANNOT BE ASSURED! Please use snail mail if this is of concern to you.

#### ABOUT THE AUTHORS

This set of questionnaires is being circulated by two internationally known sex researchers who are interested in understanding why people prefer the sexual acts they prefer. Dr. Fritz Klein is the author of *The Bisexual Option* (Haworth Press, New York, 1993) and the inventor of the Klein Sexual Orientation Grid. He is a psychiatrist living in San Diego. Dr. Jim Weinrich wrote *Sexual Landscapes: Why We Are What We Are, Why We Love Whom We Love* (Scribners, New York, 1987), and is now an AIDS researcher at the University of California, San Diego. Both have appeared in numerous professional forums and on many popular talk shows.

=====  
=====PAGE BREAK=====

\*\*\*\*\*  
General Information  
\*\*\*\*\*

We need to know the following information about you in order to know how to compare the answers from Internet volunteers with other groups we will be working with. None of this information will be used to identify you personally.

01 Begin by telling us your age: 00

02 Next tell us your level of education:

SHS: Some high school  
HSG: High school grad  
SC: Some college  
CG College grad  
HD Higher degree

03 Tell us your employment status:

:F: Full time  
P: Part time  
:U: Unemployed  
:R: Retired  
:S: Student

04 Gender: Choose "Female" if you are female.

:F: Female  
:M: Male

Note: THIS IS THE QUESTIONNAIRE FOR WOMEN! If you are a man, contact us and we will e-mail you the men's questionnaire.

05 Marital status (marriage to a member of the other sex):

:M: Currently married or in a similar committed relationship.  
:D: Currently divorced or separated.  
:S: Single, never married.

06 Homosexual relationship status (member of the same sex):

:C: Currently in a committed relationship with a female.  
:N: Currently not in a committed female-female relationship.

07 Frequency of masturbation: In the past month, how often have you masturbated to orgasm while alone?

# times per month

08 Frequency of sexual contact: In the past month, how many times have you had some form of sexual contact with another person?

# times past month

09 Number of partners: In the past month, with how many different people have you had sexual contact?

# times past month

\*\*\*\*\*  
Personality Questions  
\*\*\*\*\*

Please read each of the statements below and decide whether you would agree or disagree with the statement made. If you agree with the statement, or think that it is true about you, choose "T" (for true). If you disagree with the statement, or think that it is not true about you, choose "F" (for false). If you don't know or can't decide, choose "DK". Please respond to every item, even if you must guess on some.

10 I value respect for rules and good manners more than easy living.

- T True
- DK Don't know or can't decide
- F False

11 Teachers, ministers, and others spend too much time trying to stop us from doing what we want to do.

- T True
- DK Don't know or can't decide
- F False

12 People should insist more than they now do that moral standards be strictly followed.

- T True
- DK Don't know or can't decide
- F False

13 I think that being free to do what I want is more important than good manners and respect for rules.

- T True
- DK Don't know or can't decide
- F False

14 In making a decision, I always think carefully about what's right and proper.

- T True
- DK Don't know or can't decide
- F False

15 Most rules are made to be broken when there are good reasons for it.

- T True
- DK Don't know or can't decide
- F False

For the questions below, choose the one choice of the three with which you agree the most. The middle choice, "DK", means you can't decide whether you prefer the first or last choice.

16 I'd rather see a home that:

- A has strict standards of behavior;
- B DK
- C doesn't have too many rules.

17 I admire more:

- A a person who has average abilities, but strict morals.
- B DK

C a person who is very talented, but is sometimes not very responsible.

18 I get annoyed when people insist that I follow every single minor safety rule.

- A True, it's not always necessary.
- B DK
- C False, it's important to do things right.

19 If a bank were careless and didn't charge me for something, I'd feel:

- A I had to point it out and pay.
- B DK
- C it's not my business to tell them.

20 If a person is clever enough to get around the rules without seeming to break them, he or she should:

- A do it if there is a special reason.
- B DK
- C not do it.

\*\*\*\*\*  
Klein Sexual Orientation Grid  
\*\*\*\*\*

Use the following choices to answer the questions in this section.

- Choices: Choose 1 to indicate other sex only.  
Choose 2 to indicate other sex mostly.  
Choose 3 to indicate other sex somewhat more.  
Choose 4 to indicate both sexes equally.  
Choose 5 to indicate same sex somewhat more.  
Choose 6 to indicate same sex mostly.  
Choose 7 to indicate same sex only.

21 Select a number that best describes your sexual attraction PRESENTLY (within the past year): 1 2 3 4 5 6 7

22 Select a number that best describes your sexual attraction in the PAST: 1 2 3 4 5 6 7

23 Select a number that best describes your sexual attraction in the IDEAL: 1 2 3 4 5 6 7

24 Select a number that best describes your sexual behavior PRESENTLY (within the past year): 1 2 3 4 5 6 7

25 Select a number that best describes your sexual behavior in the PAST: 1 2 3 4 5 6 7

26 Select a number that best describes your sexual behavior in the IDEAL: 1 2 3 4 5 6 7

27 Select a number to describe your sexual fantasies PRESENTLY (for example, during masturbation, daydreaming, as part of real life, or in your imagination): 1 2 3 4 5 6 7

28 Select a number to describe your sexual \_fantasies\_ in the PAST: 1 2 3 4 5  
6 7

29 Select a number to describe your sexual \_fantasies\_ in the IDEAL: 1 2 3 4 5  
6 7

30 Select a number to describe your \_emotional preference\_ PRESENTLY (whom you  
love and like): 1 2 3 4 5 6 7

31 Select a number to describe your \_emotional preference\_ in the PAST: 1 2 3  
4 5 6 7

32 Select a number to describe your \_emotional preference\_ in the IDEAL: 1 2 3  
4 5 6 7

33 Select a number to describe the sex you \_socialize with\_ PRESENTLY (in the  
past year): 1 2 3 4 5 6 7

34 Select a number to describe the sex you have \_socialized with\_ in the PAST:  
1 2 3 4 5 6 7

35 Select a number to describe the sex you would prefer to \_socialize with\_ in  
the IDEAL: 1 2 3 4 5 6 7

Use the following choices to answer questions 36 to 41.

Choices Choose 1 to indicate heterosexual only.  
Choose 2 to indicate heterosexual mostly.  
Choose 3 to indicate heterosexual somewhat more.  
Choose 4 to indicate heterosexual/homosexual equally.  
Choose 5 to indicate homosexual somewhat more.  
Choose 6 to indicate homosexual mostly.  
Choose 7 to indicate homosexual only.

36 Select a number to describe your heterosexual, bisexual, or homosexual  
\_lifestyle\_ PRESENTLY (where and with whom you tend to spend the majority of  
your time): 1 2 3 4 5 6 7

37 Select a number to describe your heterosexual, bisexual, or homosexual  
\_lifestyle\_ in the PAST: 1 2 3 4 5 6 7

38 Select a number to describe your heterosexual, bisexual, or homosexual  
\_lifestyle\_ in the IDEAL: 1 2 3 4 5 6 7

39 Select a number to describe your \_sexual self-identification\_ (self-image)  
PRESENTLY (past year): 1 2 3 4 5 6 7

40 Select a number to describe your \_sexual self-identification\_ (self-image)  
in the PAST: 1 2 3 4 5 6 7

41 Select a number to describe your \_sexual self-identification\_ (self-image)  
in the IDEAL: 1 2 3 4 5 6 7

\*\*\*\*\*

Sex Acts (by men)

\*\*\*\*\*

Rate each sex act listed below from 1 to 5, with 1 being the least sexually exciting, and 5 being the most sexually exciting.

Sex acts with men

- 42 1 2 3 4 5 Kissing
- 43 1 2 3 4 5 Cuddling or holding
- 44 1 2 3 4 5 Cunnilingus (him going down on you)
- 45 1 2 3 4 5 Fellatio (you going down on his penis)
- 46 1 2 3 4 5 Receiving breast stimulation
- 47 1 2 3 4 5 Giving breast stimulation
- 48 1 2 3 4 5 Being masturbated by him
- 49 1 2 3 4 5 You masturbating him
- 50 1 2 3 4 5 Him fingering your anus
- 51 1 2 3 4 5 You fingering his anus
- 52 1 2 3 4 5 Receiving oral-anal (getting rimmed)
- 53 1 2 3 4 5 Giving oral-anal (rimming)
- 54 1 2 3 4 5 Penovaginal intercourse (ordinary fucking)
- 55 1 2 3 4 5 Receptive anal intercourse (getting ass-fucked)

Sex acts with women

- 56 1 2 3 4 5 Kissing
- 57 1 2 3 4 5 Cuddling or holding
- 58 1 2 3 4 5 Receiving cunnilingus (her going down on you)
- 59 1 2 3 4 5 Giving cunnilingus (you going down on her)
- 60 1 2 3 4 5 Receiving breast stimulation
- 61 1 2 3 4 5 Giving breast stimulation
- 62 1 2 3 4 5 Being masturbated by her
- 63 1 2 3 4 5 You masturbating her
- 64 1 2 3 4 5 Her fingering your anus
- 65 1 2 3 4 5 Fingering her anus
- 66 1 2 3 4 5 Receiving oral-anal (getting rimmed)
- 67 1 2 3 4 5 Giving oral-anal (rimming)
- 68 LEAVE THIS ANSWER BLANK
- 69 LEAVE THIS ANSWER BLANK

\*\*\*\*\*

Body Parts and Relationships

\*\*\*\*\*

Rate each body part and relationship listed below from 1 to 5, with 1 being the least sexually exciting, and 5 being the most sexually exciting.

Body parts of men

- 70 1 2 3 4 5 Face
- 71 1 2 3 4 5 Hair (head)
- 72 1 2 3 4 5 Breast/chest
- 73 1 2 3 4 5 Buttocks/buns/behind: large
- 74 1 2 3 4 5 Buttocks/buns/behind: small
- 75 1 2 3 4 5 Legs

- 76 1 2 3 4 5 Penis
- 77 1 2 3 4 5 Testicles/scrotum
- 78 1 2 3 4 5 Body hair: little or none
- 79 1 2 3 4 5 Body hair: a great deal
- 80 1 2 3 4 5 Torso: muscular
- 81 1 2 3 4 5 Torso: non-muscular

Body parts of women

- 82 1 2 3 4 5 Face
- 83 1 2 3 4 5 Hair (head)
- 84 1 2 3 4 5 Breasts: large
- 85 1 2 3 4 5 Breasts: small
- 86 1 2 3 4 5 Buttocks/buns/behind: large
- 87 1 2 3 4 5 Buttocks/buns/behind: small
- 88 1 2 3 4 5 Legs
- 89 1 2 3 4 5 Clitoris
- 90 1 2 3 4 5 Labia (the lips to the vagina)
- 91 1 2 3 4 5 Vagina

Relationships

- 92 1 2 3 4 5 One night stand with a man
- 93 1 2 3 4 5 One night stand with a woman
- 94 1 2 3 4 5 Long-term partnership with a man
- 95 1 2 3 4 5 Long-term partnership with a woman
- 96 1 2 3 4 5 Threesome: you and two men
- 97 1 2 3 4 5 Threesome: you, a man, and a woman
- 98 1 2 3 4 5 Threesome: you and two women
- 99 1 2 3 4 5 Orgy (more than two other people)

\*\*\*\*\*  
 Childhood Personality Scale (Men)  
 \*\*\*\*\*

Please answer the following questions about your childhood. For each question, choose the ONE answer that best describes you.

- 100 Between the ages of 6 and 12, did you prefer:
- A to play with boys
  - B to play with girls
  - C didn't make any difference
  - D not to play with other children
  - E don't remember

- 101 Between the ages of 6 and 12, did you:
- A prefer boys' games and toys (e.g. soldiers, football)
  - B prefer girls' games and toys (dolls, sewing, etc.)
  - C like or dislike both about equally
  - D had no opportunity to play games or with toys

- 102 In childhood, were you very interested in the work of a garage mechanic?  
 Was this:
- A prior to age 6
  - B between ages 6 and 12
  - C probably in both periods

D do not remember, or was not very interested in the work of a garage mechanic

103 Between ages 6 and 14, which did you like more: romantic stories or adventure stories?

- A I liked romantic stories more
- B I liked adventure stories more
- C It did not make any difference (or didn't like any stories)

104 Between the ages of 6 and 12, did you like to do jobs or chores which are usually done by women (dishwashing, dusting, etc.)?

- A yes
- B no
- C don't remember

105 Between the ages of 13 and 16, did you like to do jobs or chores which are usually done by women?

- A yes
- B no
- C don't remember

106 Between the ages of 6 and 12, when you read a story did you imagine that you were:

- A the male in the story (cowboy, detective, soldier, explorer, etc.)
- B the female in the story (the girl being saved, etc.)
- C the male sometimes and the female other times
- D neither the male nor the female
- E did not read stories

107 In childhood or at puberty, did you like mechanics magazines? Was this:

- A between ages 6 and 12
- B between ages 12 and 14
- C probably in both periods
- D do not remember, or did not like mechanics magazines

108 Between the ages of 6 and 12, did you sometimes imagine yourself as being the courageous leader of others?

- A yes
- B no
- C unsure

109 Between the ages of 6 and 12, did you wish you had been born a boy instead of a girl?

- A often
- B occasionally
- C never

110 Between the ages of 13 and 16, did you wish you had been born a boy instead of a girl?

- A often
- B occasionally
- C never

111 Since the age of 17, have you wished you had been born a boy instead of a girl?

- A often
- B occasionally



C never

112 Do you think your appearance is:

- A very feminine
- B feminine
- C a little masculine
- D quite masculine

113 Between ages 6 and 12, did you sometimes imagine, in your fantasies, yourself physically defending someone against a monster, a dangerous animal, or "evil" people?

- A prior to age 6
- B between ages 6 and 12
- C probably in both periods
- D do not remember, or did not have such fantasies

114 In childhood fantasies, did you sometimes wish you could go hunting big game, or did you very much enjoy actually doing so? Was this:

- A prior to age 6
- B between ages 6 and 12
- C probably in both periods
- D do not remember, or did not have such fantasies

115 In childhood, did you wish you would become very strong physically? Was this:

- A prior to age 6
- B between ages 6 and 12
- C probably in both periods
- D do not remember, or did not have the desire to become very strong physically

116 In childhood, was there ever a period in which wished you would, when adult, become a dressmaker or dress designer? Was this:

- A prior to age 6
- B between ages 6 and 12
- C probably in both periods
- D do not remember, or did not have this desire

117 In childhood fantasies, did you sometimes imagine yourself driving a racing car? Was this:

- A prior to age 6
- B between ages 6 and 12
- C probably in both periods
- D do not remember, or did not have this fantasy

118 In childhood, did you ever wish to become a dancer? Was this:

- A prior to age 6
- B between ages 6 and 12
- C probably in both periods
- D do not remember, or did not have this desire

119 In childhood, did you ever wish to become a pilot, or did you fantasize yourself being a pilot? Was this:

- A prior to age 6
- B between ages 6 and 12
- C probably in both periods
- D do not remember, or did not have such a desire

- 120 Between the ages of 5 and 10, were you teased by other kids?  
A never  
B rarely (less than once a month)  
C sometimes  
D often (twice a week or more)
- 121 Which group of kids teased you in the most emotionally painful way?  
A smart kids  
B popular kids  
C athletic kids  
D misbehaving kids  
E rough-and-tumble, rough-housing kids  
F girls doing girl stuff  
G boys doing boy stuff  
H other kids never teased me
- 122 Were those teasing kids...  
A mostly boys  
B mostly girls  
C about half boys and half girls  
D other kids never teased me
- 123 Was the teasing you got from those kids...  
A the MOST emotionally painful experience of your childhood  
B SOME of your most emotionally upsetting experiences in childhood  
C only moderately upsetting  
D not upsetting at all

\*\*\*\*\*  
THANK YOU! THANK YOU! THANK YOU! THANK YOU! THANK YOU! THANK YOU!  
\*\*\*\*\*

If you wish to respond by e-mail, remember to DELETE all the answers which are INcorrect for you, leaving only the answers which are correct for you. You can also ignore the answer sheets which follow immediately after these notes.

\*\*\*\*\*

If you wish to respond by fax or by US Mail, you only need to print out the answer sheets which follow. As described in the instructions, use a pencil to CROSS OUT, BLOB OUT, or OBLITERATE each answer which is correct for you. Do not circle your answer and do not use a single slash. Then fax or mail these sheets of paper to us as described in the instructions.

=====PAGE BREAK=====

GENERAL INFORMATION ANSWER SHEET

- \* This answer sheet will be scanned by computer.
  - \* Use a pencil to mark your answers; completely erase a mistake.
  - \* Always cross out or obliterate the answer you choose.
  - \* Do not slop over onto neighboring answers or lines.
- [Questionnaire code: GI Internet]

|         |                        |                |            |
|---------|------------------------|----------------|------------|
| 01 AGE  | 02 EDUCATION           | 03 EMPLOYMENT  | 04 GENDER  |
| :0:     | :SHS: Some high school | :F: Full time  | :F: Female |
| :1: :1: | :HSG: High school grad | :P: Part time  | :M: Male   |
| :2: :2: | :SC: Some college      | :U: Unemployed |            |
| :3: :3: | :CG: College grad      | :R: Retired    |            |
| :4: :4: | :HD: Higher degree     | :S: Student    |            |
| :5: :5: |                        |                |            |
| :6: :6: | 05 MARITAL             | 06 HOMOSEXUAL  |            |
| :7: :7: | STATUS                 | RELATIONSHIP   |            |
| :8: :8: | :M: Married            | STATUS         |            |
| :9: :9: | :D: Divorced           | :C: Coupled    |            |
|         | :S: Single             | :N Not coupled |            |

|                 |              |             |
|-----------------|--------------|-------------|
| 07 MASTURBATION | 08 FREQUENCY | 09 PARTNERS |
| :0:             | :0:          | :0:         |
| :1: :1:         | :1: :1:      | :1: :1:     |
| :2: :2:         | :2: :2:      | :2: :2:     |
| :3: :3:         | :3: :3:      | :3: :3:     |
| :4: :4:         | :4: :4:      | :4: :4:     |
| :5: :5:         | :5: :5:      | :5: :5:     |
| :6: :6:         | :6: :6:      | :6: :6:     |
| :7: :7:         | :7: :7:      | :7: :7:     |
| :8: :8:         | :8: :8:      | :8: :8:     |
| :9: :9:         | :9: :9:      | :9: :9:     |

PERSONALITY

|    |     |      |     |
|----|-----|------|-----|
| 10 | :T: | :DK: | :F: |
| 11 | :T: | :DK: | :F: |
| 12 | :T: | :DK: | :F: |
| 13 | :T: | :DK: | :F: |
| 14 | :T: | :DK: | :F: |
| 15 | :T: | :DK: | :F: |
| 16 | :A: | :B:  | :C: |
| 17 | :A: | :B:  | :C: |
| 18 | :A: | :B:  | :C: |
| 19 | :A: | :B:  | :C: |
| 20 | :A: | :B:  | :C: |

KLEIN GRID ANSWER SHEET

[Questionnaire code: KSOG Internet]

21 :1: :2: :3: :4: :5: :6: :7:  
22 :1: :2: :3: :4: :5: :6: :7:  
23 :1: :2: :3: :4: :5: :6: :7:  
24 :1: :2: :3: :4: :5: :6: :7:  
25 :1: :2: :3: :4: :5: :6: :7:  
26 :1: :2: :3: :4: :5: :6: :7:  
27 :1: :2: :3: :4: :5: :6: :7:  
28 :1: :2: :3: :4: :5: :6: :7:  
29 :1: :2: :3: :4: :5: :6: :7:  
30 :1: :2: :3: :4: :5: :6: :7:  
31 :1: :2: :3: :4: :5: :6: :7:  
32 :1: :2: :3: :4: :5: :6: :7:  
33 :1: :2: :3: :4: :5: :6: :7:  
34 :1: :2: :3: :4: :5: :6: :7:  
35 :1: :2: :3: :4: :5: :6: :7:  
36 :1: :2: :3: :4: :5: :6: :7:  
37 :1: :2: :3: :4: :5: :6: :7:  
38 :1: :2: :3: :4: :5: :6: :7:  
39 :1: :2: :3: :4: :5: :6: :7:  
40 :1: :2: :3: :4: :5: :6: :7:  
41 :1: :2: :3: :4: :5: :6: :7:

| Least sexually exciting | Most sexually exciting | Least sexually exciting | Most sexually exciting |
|-------------------------|------------------------|-------------------------|------------------------|
| 42 :1: :2: :3: :4: :5:  |                        | 56 :1: :2: :3: :4: :5:  |                        |
| 43 :1: :2: :3: :4: :5:  |                        | 57 :1: :2: :3: :4: :5:  |                        |
| 44 :1: :2: :3: :4: :5:  |                        | 58 :1: :2: :3: :4: :5:  |                        |
| 45 :1: :2: :3: :4: :5:  |                        | 59 :1: :2: :3: :4: :5:  |                        |
| 46 :1: :2: :3: :4: :5:  |                        | 60 :1: :2: :3: :4: :5:  |                        |
| 47 :1: :2: :3: :4: :5:  |                        | 61 :1: :2: :3: :4: :5:  |                        |
| 48 :1: :2: :3: :4: :5:  |                        | 62 :1: :2: :3: :4: :5:  |                        |
| 49 :1: :2: :3: :4: :5:  |                        | 63 :1: :2: :3: :4: :5:  |                        |
| 50 :1: :2: :3: :4: :5:  |                        | 64 :1: :2: :3: :4: :5:  |                        |
| 51 :1: :2: :3: :4: :5:  |                        | 65 :1: :2: :3: :4: :5:  |                        |
| 52 :1: :2: :3: :4: :5:  |                        | 66 :1: :2: :3: :4: :5:  |                        |
| 53 :1: :2: :3: :4: :5:  |                        | 67 :1: :2: :3: :4: :5:  |                        |
| 54 :1: :2: :3: :4: :5:  |                        | 68 :1: :2: :3: :4: :5:  |                        |
| 55 :1: :2: :3: :4: :5:  |                        | 69 :1: :2: :3: :4: :5:  |                        |

BODY PARTS/RELATIONSHIPS ANSWER SHEET

[Questionnaire code: BPR Internet]

| Least sexually exciting |     |     |     | Most sexually exciting |     | Least sexually exciting |     |     |     | Most sexually exciting |     |
|-------------------------|-----|-----|-----|------------------------|-----|-------------------------|-----|-----|-----|------------------------|-----|
| 70                      | :1: | :2: | :3: | :4:                    | :5: | 82                      | :1: | :2: | :3: | :4:                    | :5: |
| 71                      | :1: | :2: | :3: | :4:                    | :5: | 83                      | :1: | :2: | :3: | :4:                    | :5: |
| 72                      | :1: | :2: | :3: | :4:                    | :5: | 84                      | :1: | :2: | :3: | :4:                    | :5: |
| 73                      | :1: | :2: | :3: | :4:                    | :5: | 85                      | :1: | :2: | :3: | :4:                    | :5: |
| 74                      | :1: | :2: | :3: | :4:                    | :5: | 87                      | :1: | :2: | :3: | :4:                    | :5: |
| 75                      | :1: | :2: | :3: | :4:                    | :5: | 88                      | :1: | :2: | :3: | :4:                    | :5: |
| 76                      | :1: | :2: | :3: | :4:                    | :5: | 89                      | :1: | :2: | :3: | :4:                    | :5: |
| 77                      | :1: | :2: | :3: | :4:                    | :5: | 90                      | :1: | :2: | :3: | :4:                    | :5: |
| 78                      | :1: | :2: | :3: | :4:                    | :5: | 91                      | :1: | :2: | :3: | :4:                    | :5: |
| 79                      | :1: | :2: | :3: | :4:                    | :5: |                         |     |     |     |                        |     |
| 80                      | :1: | :2: | :3: | :4:                    | :5: |                         |     |     |     |                        |     |
| 81                      | :1: | :2: | :3: | :4:                    | :5: |                         |     |     |     |                        |     |

|    |     |     |     | Least sexually exciting |     |  |  |  |  | Most sexually exciting |
|----|-----|-----|-----|-------------------------|-----|--|--|--|--|------------------------|
| 92 | :1: | :2: | :3: | :4:                     | :5: |  |  |  |  |                        |
| 93 | :1: | :2: | :3: | :4:                     | :5: |  |  |  |  |                        |
| 94 | :1: | :2: | :3: | :4:                     | :5: |  |  |  |  |                        |
| 95 | :1: | :2: | :3: | :4:                     | :5: |  |  |  |  |                        |
| 96 | :1: | :2: | :3: | :4:                     | :5: |  |  |  |  |                        |
| 97 | :1: | :2: | :3: | :4:                     | :5: |  |  |  |  |                        |
| 98 | :1: | :2: | :3: | :4:                     | :5: |  |  |  |  |                        |
| 99 | :1: | :2: | :3: | :4:                     | :5: |  |  |  |  |                        |

=====PAGE BREAK=====

CHILDHOOD PERSONALITY ANSWER SHEET

[Questionnaire code: CPA Internet]

100 :A: :B: :C: :D: :E:  
101 :A: :B: :C: :D:  
102 :A: :B: :C: :D:  
103 :A: :B: :C:  
104 :A: :B: :C:  
105 :A: :B: :C:

106 :A: :B: :C: :D: :E:  
107 :A: :B: :C: :D:  
108 :A: :B: :C: :D:  
109 :A: :B: :C:  
110 :A: :B: :C:  
111 :A: :B: :C:

112 :A: :B: :C: :D:  
113 :A: :B: :C: :D:  
114 :A: :B: :C: :D:  
115 :A: :B: :C: :D:  
116 :A: :B: :C: :D:  
117 :A: :B: :C: :D:

118 :A: :B: :C: :D:  
119 :A: :B: :C: :D:  
120 :A: :B: :C: :D:  
121 :A: :B: :C: :D: :E: :F: :G: :H:  
122 :A: :B: :C: :D:  
123 :A: :B: :C: :D:

=====END OF QUESTIONNAIRE=====
